# Supplementary material for: Understanding bovine embryo elongation: a transcriptomic study of trophoblastic vesicles
Source: Frontiers journal article supplement (doi:10.3389/fphys.2024.1331098), 2024-01-29

# Figure S1

## ALL SAMPLES

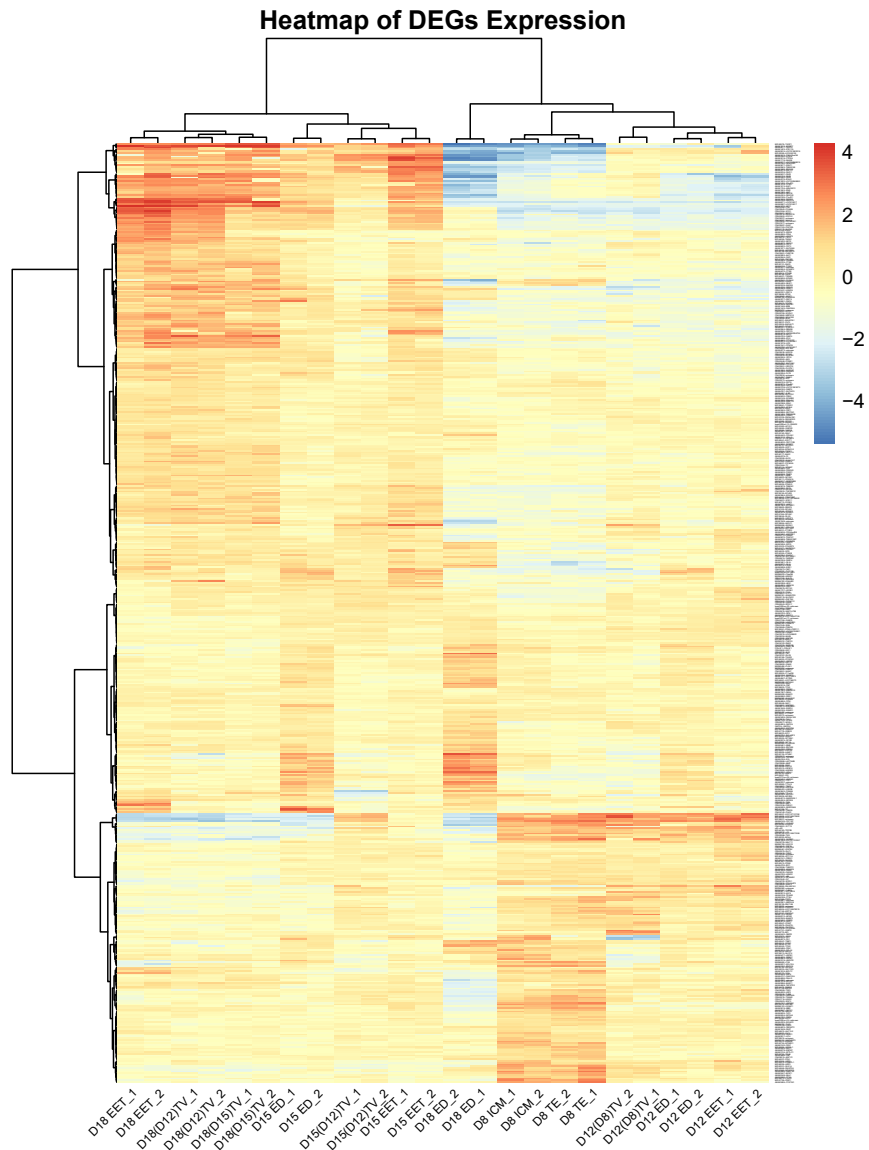

## Without (ICM, ED) SAMPLES

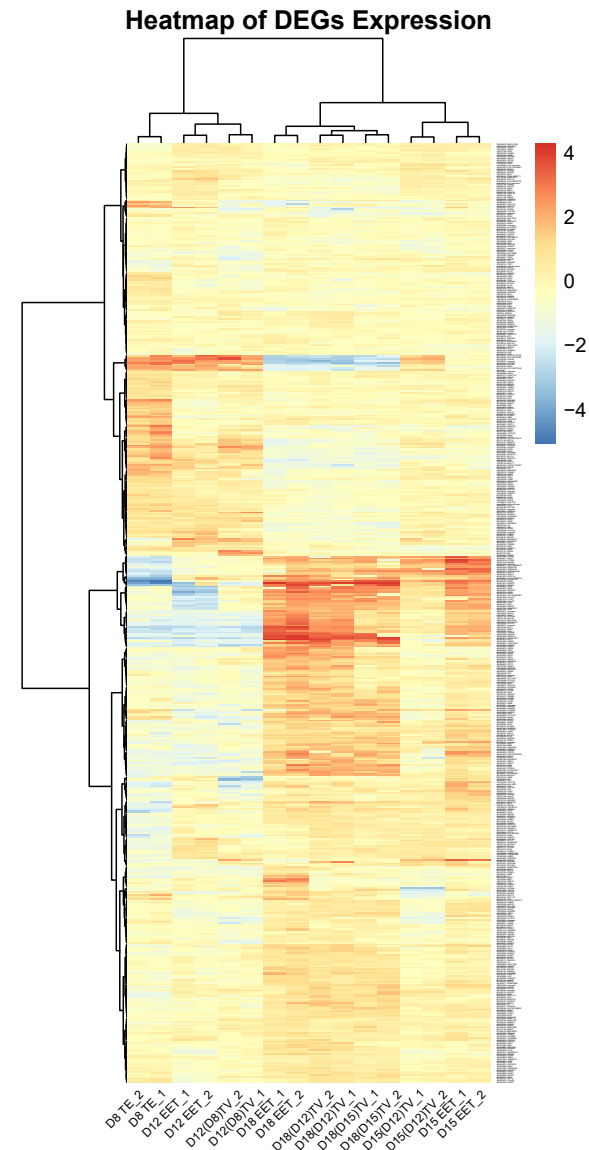

Supplement: Data_Sheet_1.PDF [file Data_Sheet_1.PDF]
